# Supplementary material for: Biodegradable germanium nanoparticles as contrast agents for near-infrared-II photoacoustic imaging
Source: Royal Society of Chemistry journal article supplement (doi:10.1039/d3nr01594g), 2023-01-01
Supplement: d3nr01594g2.pdf [file d3nr01594g2.pdf]

## A table of contents entry

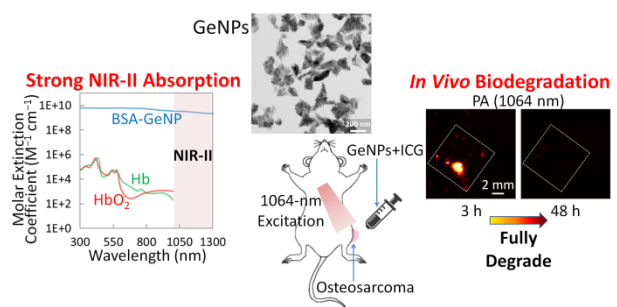

Researchers develop novel germanium nanoparticles (GeNPs) as contrast agents for near-infrared-II photoacoustic imaging. The GeNPs are found to have high photothermal stability, good biocompatibility and most importantly, *in vivo* biodegradability.
